# Supplementary material
Source: MDPI journal article supplement (https://www.mdpi.com/2076-3417/14/8/3418)
Supplement: s1 [file s1]

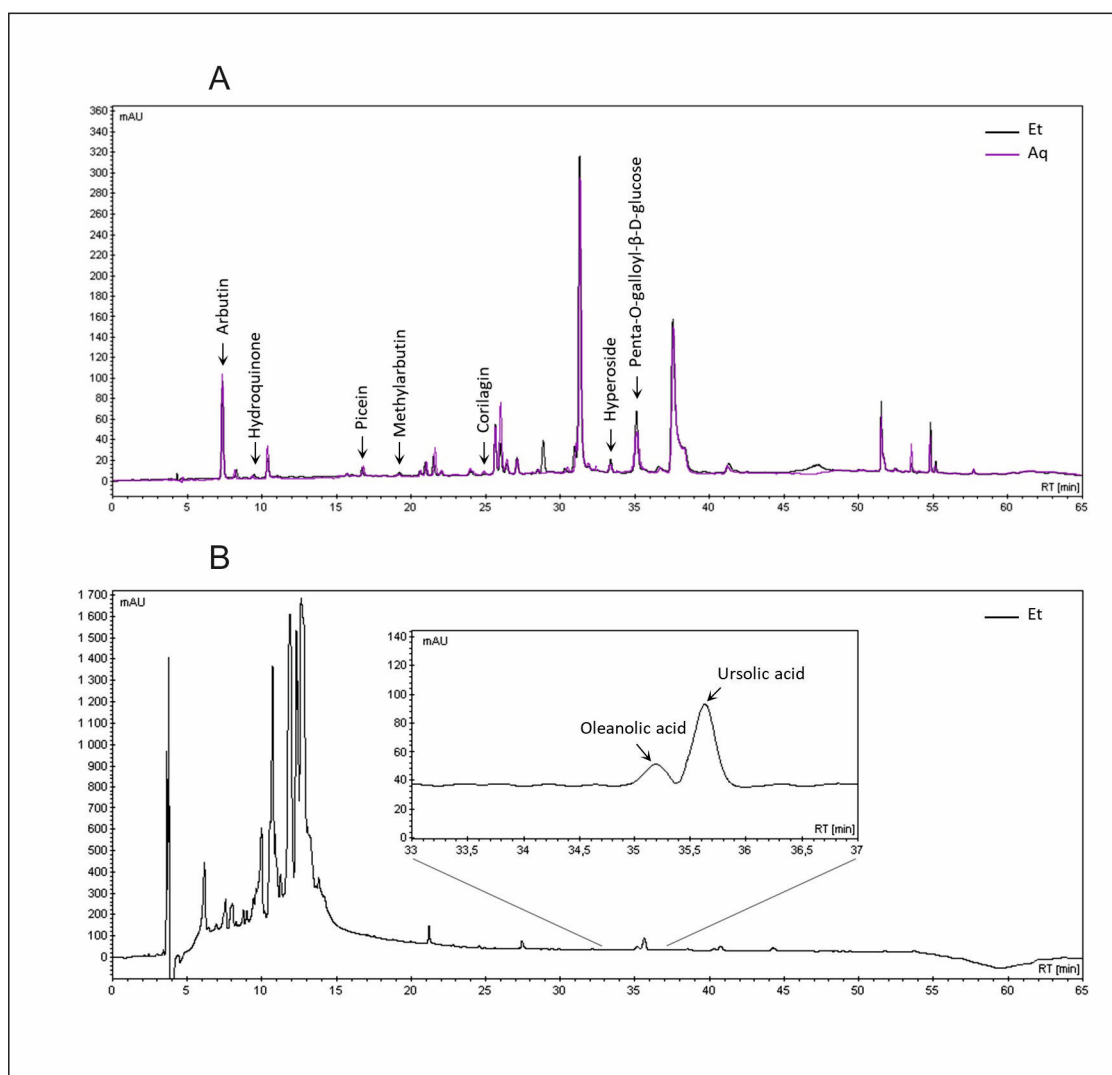

**Figure S1.** Exemplary HPLC chromatograms of bearberry leaf extracts. A—chromatogram for phenolic compounds at 280 nm; B—chromatogram for triterpenoids at 210 nm; Et—ethanolic extract, and Aq—aqueous extract.
